# Supplementary material
Source: publisher figshare collection journal article supplement (https://acs.figshare.com/ndownloader/files/4181710)
Supplement: Supplementary file 1 [file 4181710]

# Supporting Information

for

## Degradation products from consumer nanocomposites – a case study on quantum dot lighting

Jingyu Liu<sup>1‡</sup>, John Katahara<sup>2‡</sup>, Guanglai Li<sup>4</sup>, Seth Coe-Sullivan<sup>3</sup>, Robert H. Hurt<sup>2,4\*</sup>

<sup>1</sup> Department of Chemistry, Brown University, Providence, RI

<sup>2</sup> School of Engineering, Brown University, Providence, RI

<sup>3</sup> QD Vision Inc., Lexington, MA

<sup>4</sup> Institute for Molecular and Nanoscale Innovation, Brown University, Providence, RI

‡ These authors contributed equally to this work.

\* Corresponding author phone: 401-863-2685; Fax: 401-863-9120; e-mail: [Robert\\_Hurt@brown.edu](mailto:Robert_Hurt@brown.edu)

**Supporting information:** 7 Pages, 7 Figures

### Additional Details on Methods

#### **Fluorescence Intensity Analysis of Aged QD-Embedded Polymers.**

The QD degradation within the polymer host was monitored by fluorescence intensity change using an Olympus IX71 Inverted Microscope equipped with an X-Cite<sup>®</sup> exacte light source and a 581 nm fluorescence filter (ET-mCherry Texas Red<sup>®</sup> ET560/40x, Chroma technology Corp. VT). The QD-embedded polymer films were exposed to simulant fluids at a ratio of 1 mg/mL followed by rotation at 60 rpm in the dark for 7 days, during which time polymer samples were taken out for fluorescence imaging every 24 hours and were then re-exposed to fresh simulant fluids. The fluorescence images were acquired with a UPlanApo 10× objective and an XM10 monochrome camera using a fluorescence lamp intensity at 4% of maximum, exposure time of 1.5 s (HNO<sub>3</sub> and gastric acid) or 2.5 ms (TCLP, MHRW, SHA, SFA, PBS and H<sub>2</sub>O<sub>2</sub>) and resolution of 1376×1038. Image analysis was performed using CellSens<sup>®</sup> Dimension Imaging software to obtain the mean fluorescence intensity of the acquired area. 20 fluorescence intensities of each sample were recorded for statistic purpose.

## Additional Details on Results and Discussion

### Analysis of equilibrium $\text{Cd}^{2+}$ adsorption on NOM using Langmuir-Freundlich (LF) model.

The Langmuir-Freundlich (LF) model is giving by<sup>1,2</sup>:

$$Q_e = \frac{Q_{\max} K_{SM} C_e^n}{1 + K_{SM} C_e^n} \quad (\text{eq.1})$$

where,  $C_e$  is the equilibrium concentration of the metal cations (mg/L),  $Q_e$  is the amount of adsorbed metal per unit mass of adsorbent at equilibrium (mg/mg),  $Q_{\max}$  is the maximum adsorption capacity of metal per unit mass of adsorbent (mg/mg),  $K_{SM}$  is the equilibrium binding constant, and  $n$  is a heterogeneity index that varies from 0 to 1. Figure S5B presents  $\text{Cd}^{2+}$  adsorption isotherms fit to a this model. The least squares LF parameters ( $Q_{\max}$ ,  $K_{SM}$ , and  $n$ ) are given in Fig. S5 caption.

### Estimation of Typical Diffusion Time in Prototype Acrylate Polymer Films

Diffusion times in porous media can be estimated as follows:

$$t \sim L^2/D_{\text{eff}} \quad (\text{eq. 2})$$

where  $L$  is the diffusion length (thickness of polymer film  $\sim 100 \mu\text{m}$ ),  $D_{\text{eff}}$  is the effective diffusion coefficient that describes diffusion through the pore space of porous media, which is given by:

$$D_{\text{eff}} = D\theta/\tau \quad (\text{eq. 3})$$

where  $D$  is the diffusion coefficient in liquid phase (typically  $10^{-5} \text{ cm}^2/\text{s}$ ),  $\theta$  is the porosity available for transportation, and  $\tau$  is the tortuosity (typically varies between 2 and  $6^3$ , here we use 4).

The porosity is calculated by:

$$\theta = V_v/V_T \quad (\text{eq. 4})$$

where  $V_v$  is the volume of void-space and  $V_T$  is the bulk volume of polymer. We use water infiltration (0.11 g/g polymer) and a typical acrylate polymer density of  $1.2 \text{ g/cm}^3$  to estimate  $\theta$ :

$$\theta = \frac{0.11 \text{ g}/(1 \text{ g/cm}^3)}{1 \text{ g}/(1.2 \text{ g/cm}^3)} = 0.132$$

Together, the estimated diffusion time in prototype acrylate polymer films is  $\sim 303 \text{ s}$ .

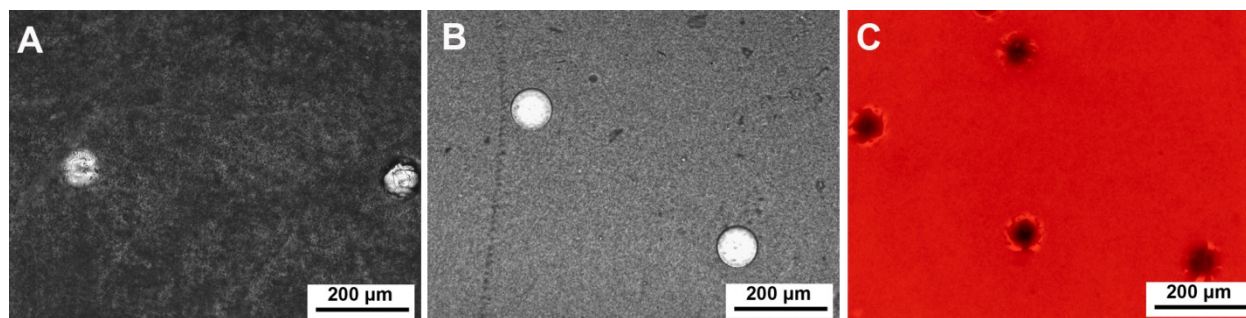

**Figure S1.** Optical images of QD-embedded polymer nanocomposites. (A) Bright field image of as-received sample; (B) bright field image of DI water rinsed sample; and (C) fluorescence image of as-received sample. Images were acquired using Olympus IX71 Inverted Microscope at 10× magnification.

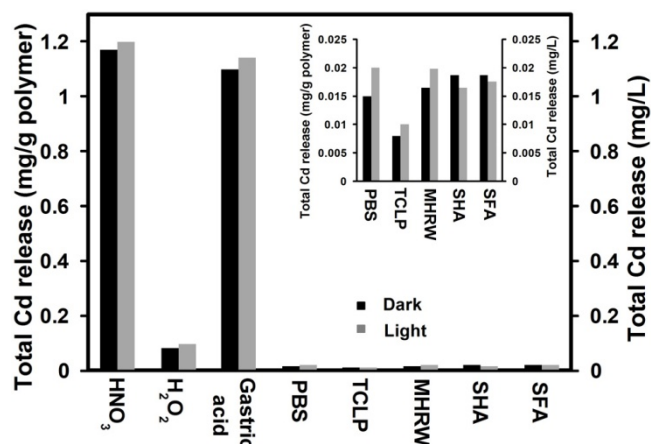

**Figure S2.** Total Cd release after 30 day dark or light exposure to simulant fluids. QD-embedded polymers were exposed at 1 mg polymer/mL solution, and were rotated under dark or ambient light at 60 rpm.

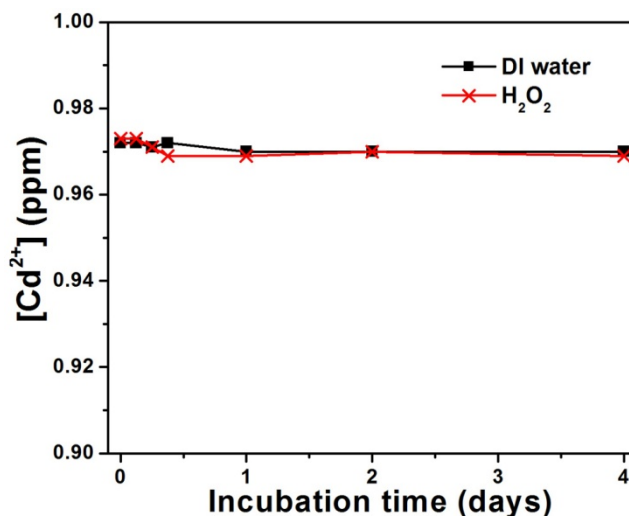

**Figure S3** Time dependent measurement of  $\text{Cd}^{2+}$  concentration during incubation of QD-free polymer with  $\text{CdCl}_2$  in DI water and 1 mM  $\text{H}_2\text{O}_2$ . The experiment was conducted at 25 °C in the dark, and QD-free polymer was used at 1 mg polymer/mL.

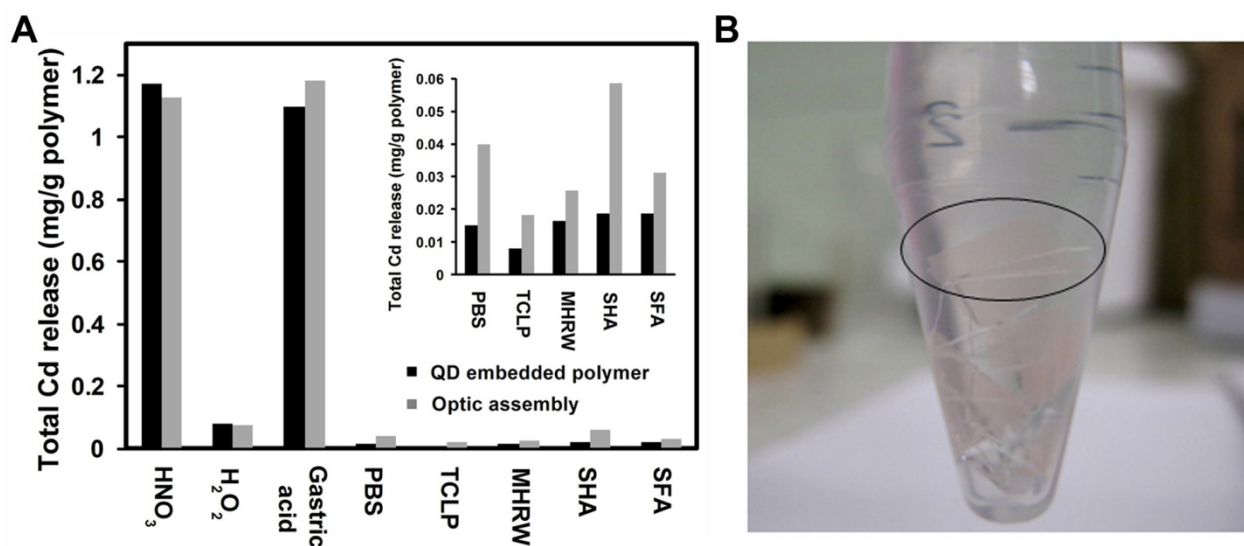

**Figure S4.** Comparison of Cd release from the full prototype optic and bare polymer. (A) 30-day total Cd release. Samples were exposed to simulant fluids for 30 days at 27.4 mg optic/mL solution (equivalent to 0.6 mg polymer/mL) or 1 mg polymer/mL solution respectively, and were rotated in the dark at 25 °C. The concentration of Cd in leachate (mg/L) = Cd release (mg-Cd/g polymer) × polymer dosage (g/L) (B) Photograph of prototype optic after 4 day exposure in TCLP showing detachment of QD-embedded polymer from glass plate housing (indicated by circle). The optic assembly was cut into small pieces (~ 7 mm×7 mm) and exposed to TCLP by rotating at 60 rpm in dark.

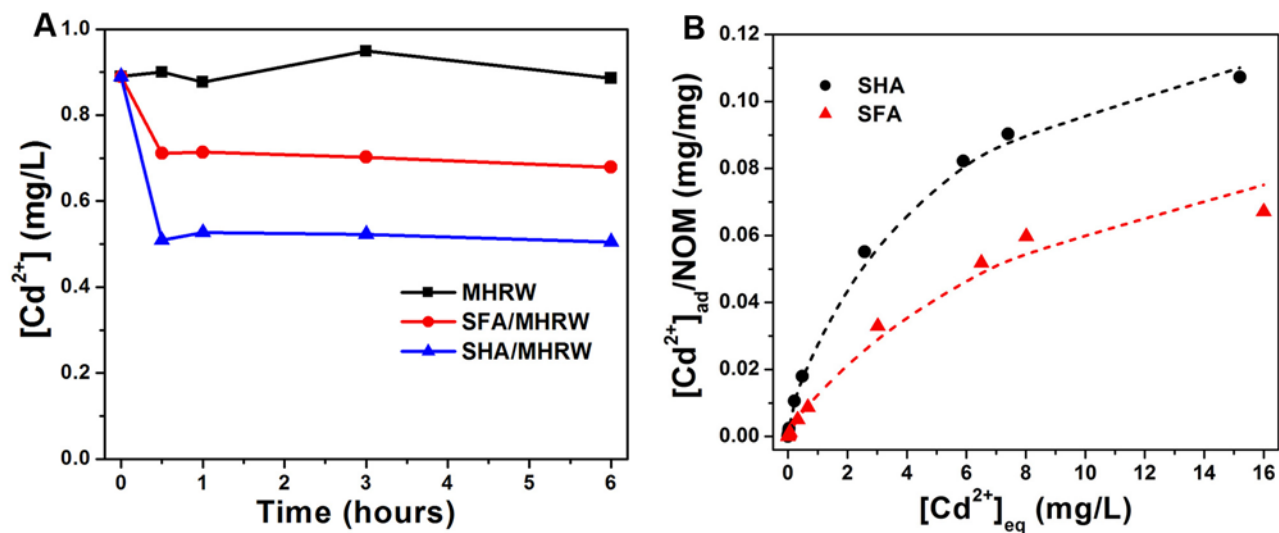

**Figure S5.** Cd<sup>2+</sup> adsorption on NOM. (A) Time dependent measurements of Cd<sup>2+</sup> concentration in MHRW and NOM, showing rapid Cd<sup>2+</sup> adsorption on NOM. The experiment was conducted at 25 °C and NOM was added at 20 mg/L. (B) Equilibrium adsorption isotherms for Cd<sup>2+</sup> binding to SHA, SFA at 25 °C. NOM was used at 20 mg/L in MHRW, and the NOM/adsorbed-Cd<sup>2+</sup> phase was removed by centrifugal ultrafiltration prior to ICP analysis. The dashed lines give the calculated adsorption isotherms derived from Langmuir-Freundlich isotherm model, where  $Q_{\max}$  (SHA) = 0.156 mg/mg,  $K_{SM}$  (SHA) = 0.249 L/mg,  $n$  (SHA) = 0.830, and  $Q_{\max}$  (SFA) = 0.131 mg/mg,  $K_{SM}$  (SFA) = 0.114 L/mg,  $n$  (SFA) = 0.890.

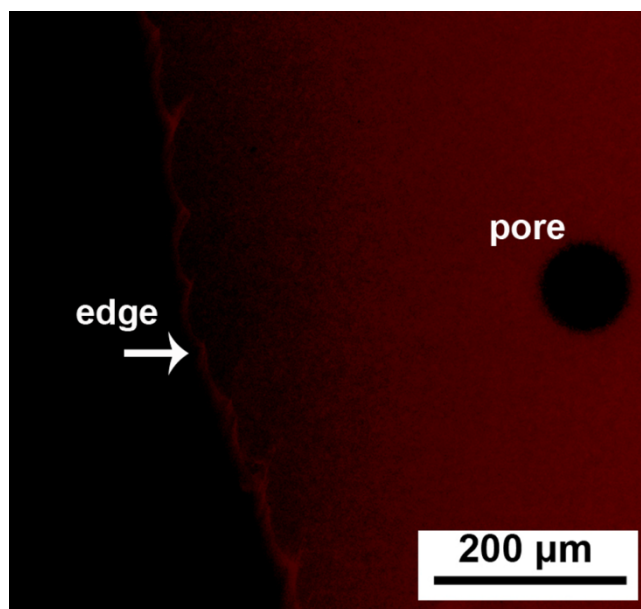

**Figure S6.** Fluorescence microscope image of QD-embedded polymer after 1-day exposure to 1 mM H<sub>2</sub>O<sub>2</sub>, showing the bleaching of fluorescence is more pronounced at the edge.

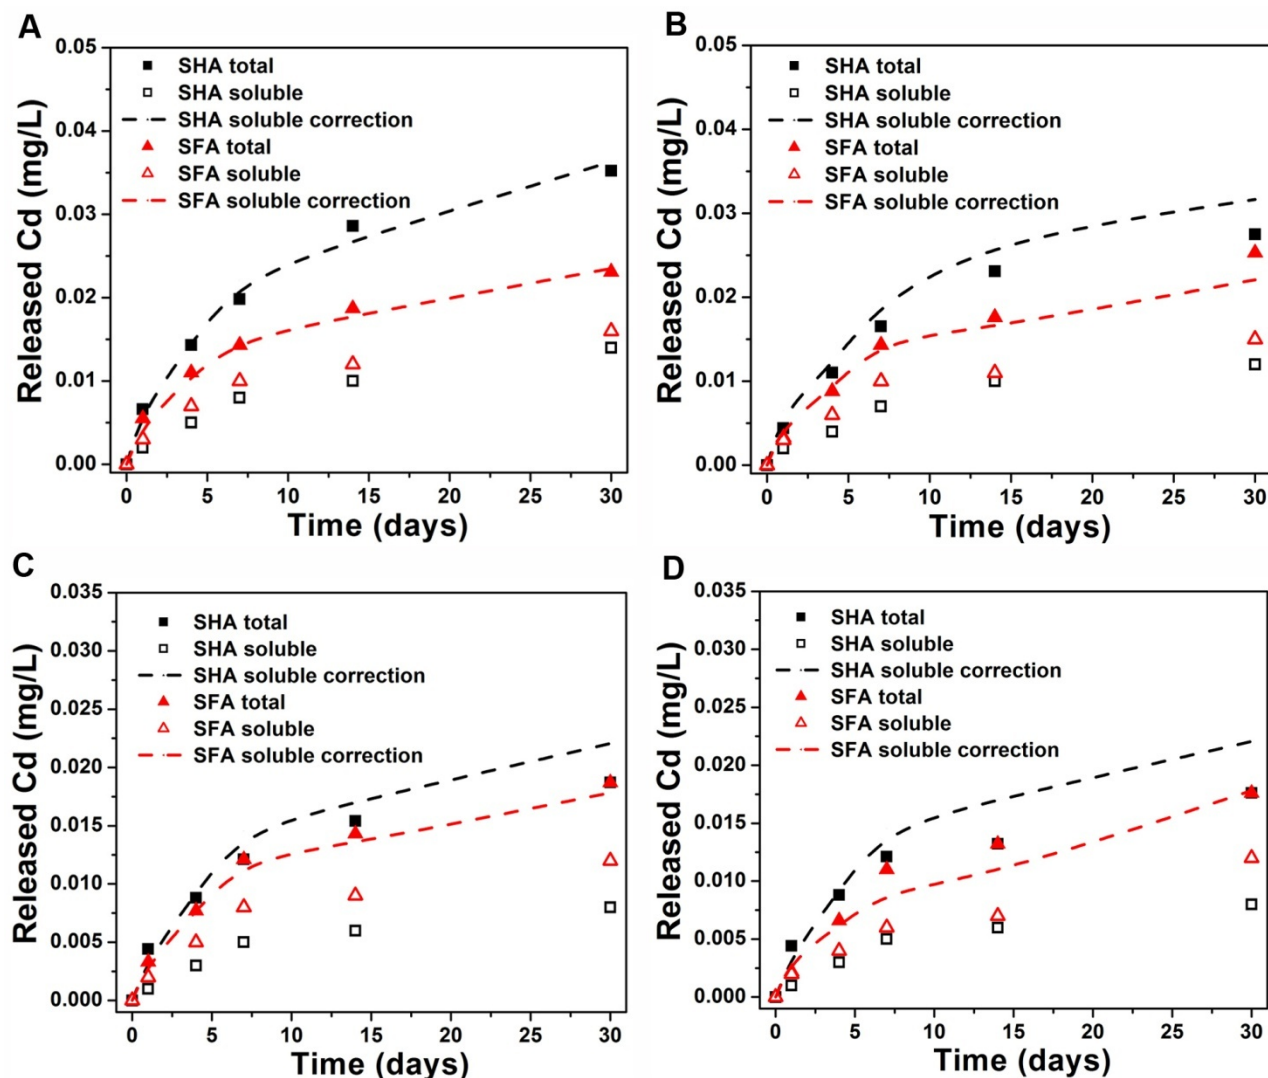

**Figure S7.** Total and soluble Cd release from QD optic samples in the presence of SHA and SFA (points) and correction of the soluble release for  $\text{Cd}^{2+}$  adsorbed on NOM (dashed lines). (A) Glass protected optic assembly under dark exposure; (B) Glass protected optic assembly under light exposure; (C) QD-embedded polymer under dark exposure; and (D) QD-embedded polymer under light exposure. The dashed lines give the calculated total Cd release based on Langmuir-Freundlich fitting of soluble Cd, suggesting the difference between total and soluble Cd is primarily due to ion adsorption on NOM.

## References

1. Janoš, P.; Sypecká, J.; Mlčková, P.; Kuráň, P.; Pilařová, V.; Removal of metal ions from aqueous solutions by sorption onto untreated low-rank coal (oxihumolite). *Separ. Purif. Technol.* **2007**, *53* (3), 322-329.
2. Umpleby, R. J.; Baxter, S. C.; Chen, Y.; Shah, R. N.; Shimizu, K. D. Characterization of molecularly imprinted polymers with the Langmuir-Freundlich isotherm. *Anal. Chem.* **2001**, *73* (19), 4584-4591.
3. Evans, J. R.; Davids, W. G.; MacRae, J. D.; Amirbahman, A. Kintics of cadmium uptake by chitosan-based crab shells. *Water Res.* **2002**, *36* (13), 3219-3226.
